# Supplementary material for: Identification and analysis of ribosome-associated lncRNAs using ribosome profiling data
Source: PubMed Central journal article supplement (PMC5975437; doi:10.1186/s12864-018-4765-z), 2018-05-29

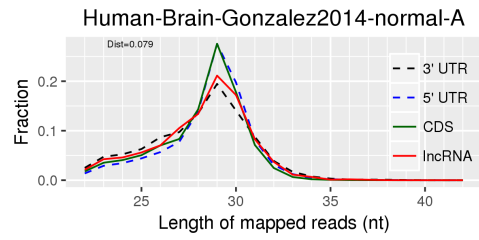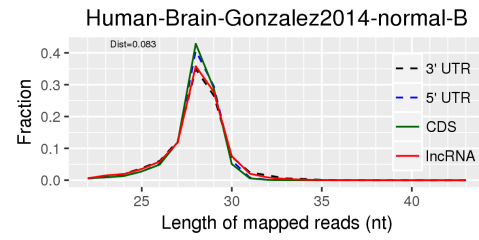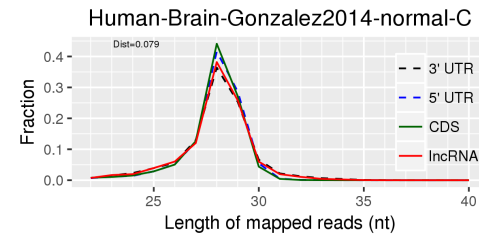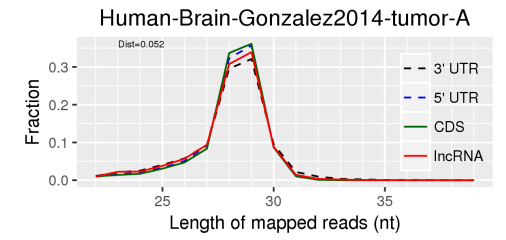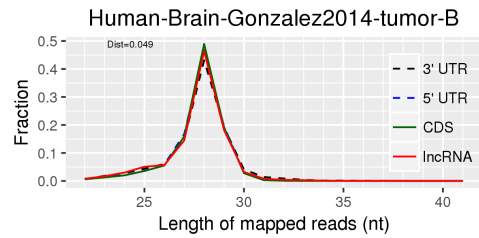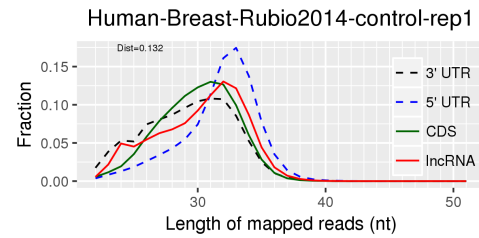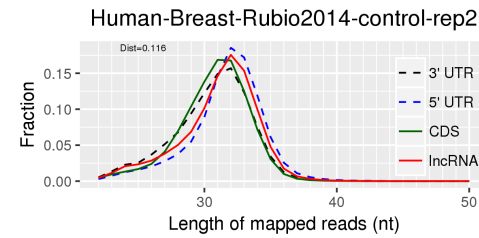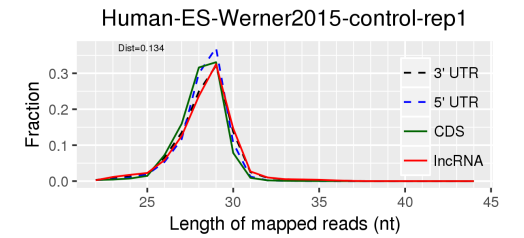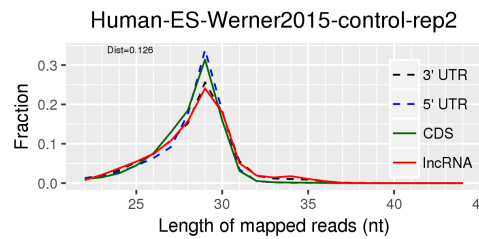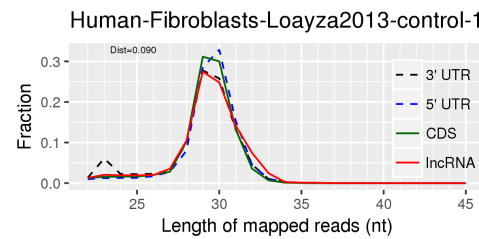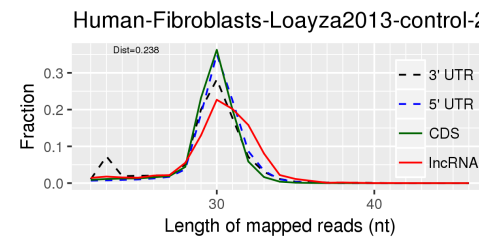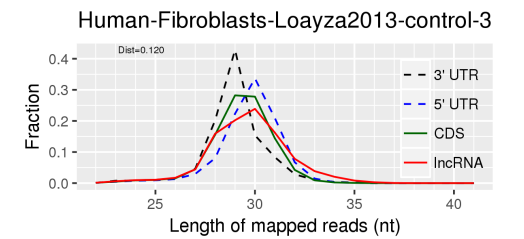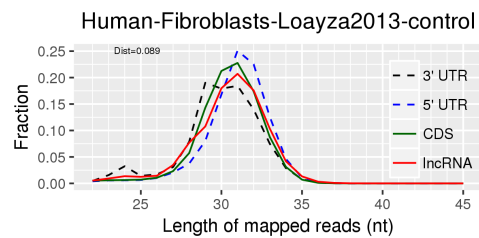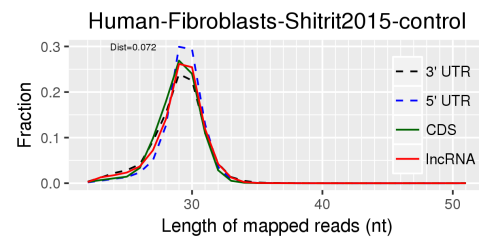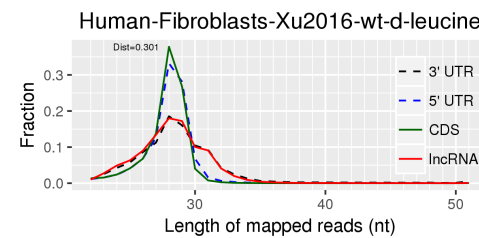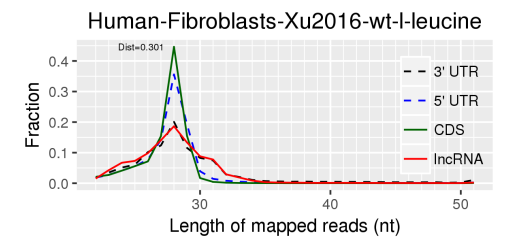

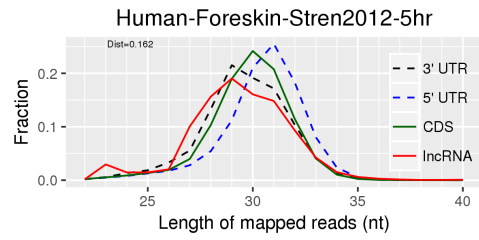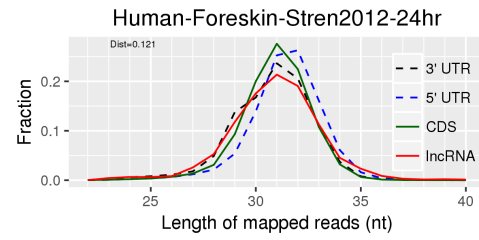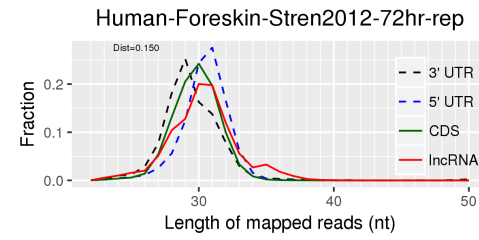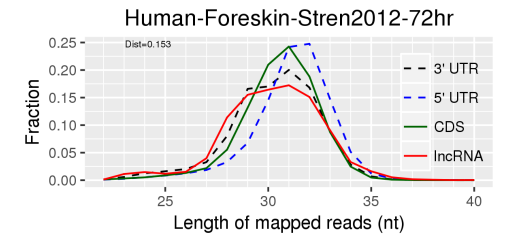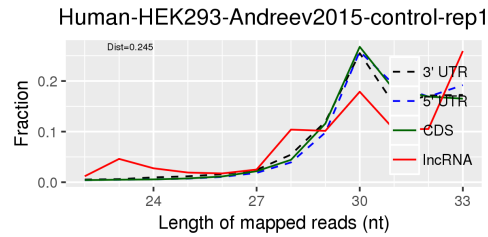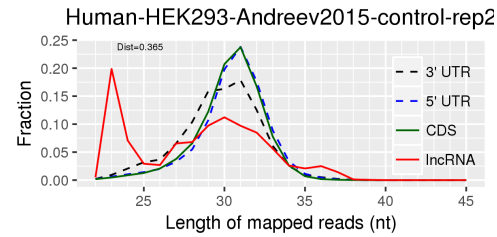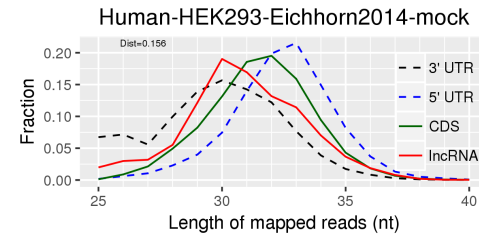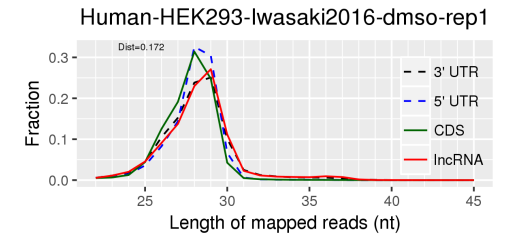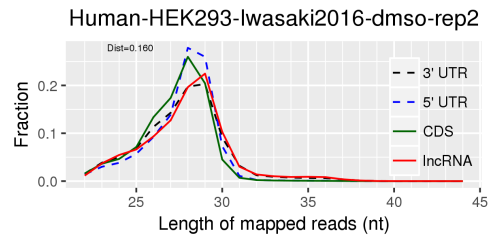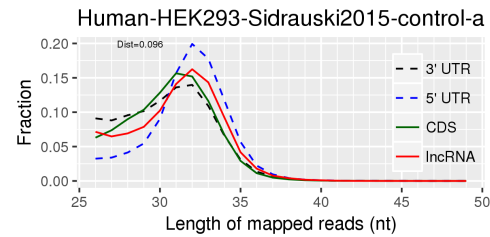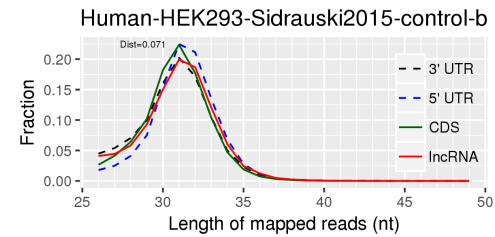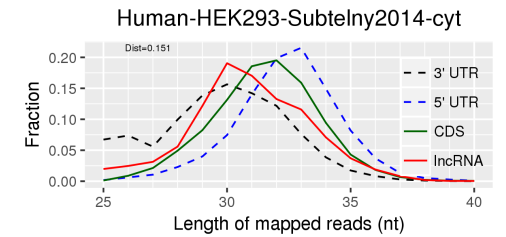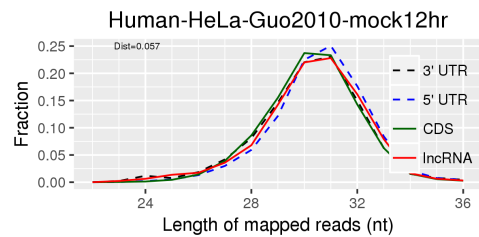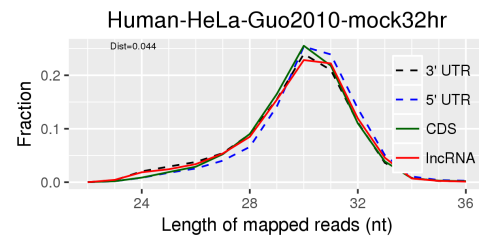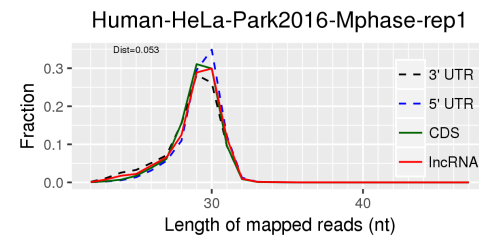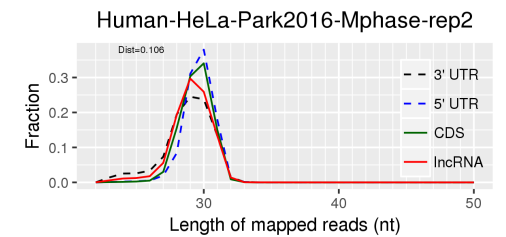

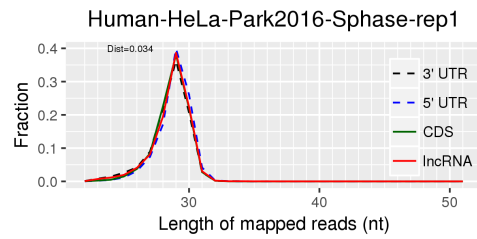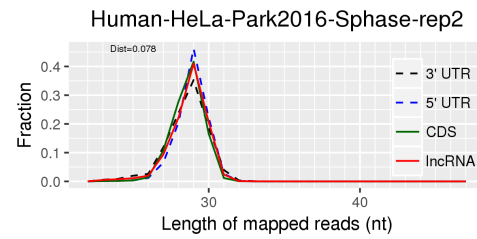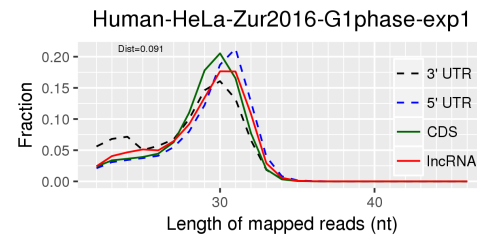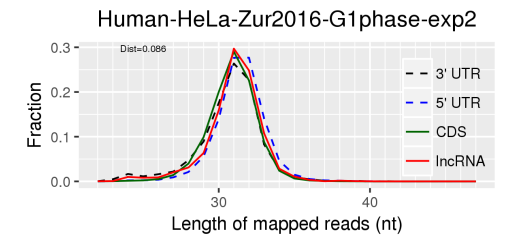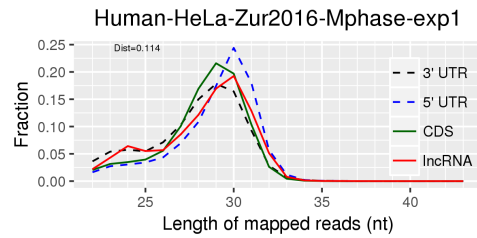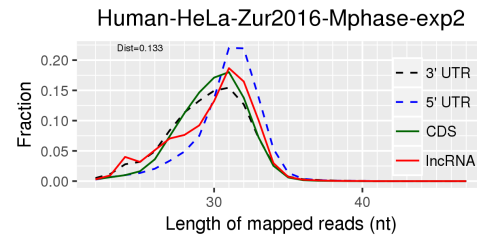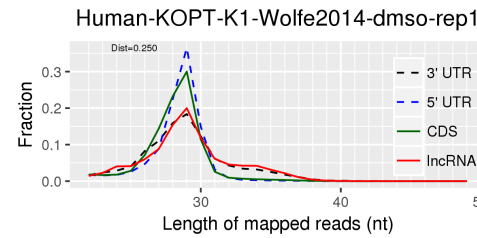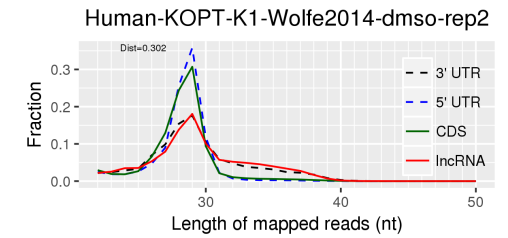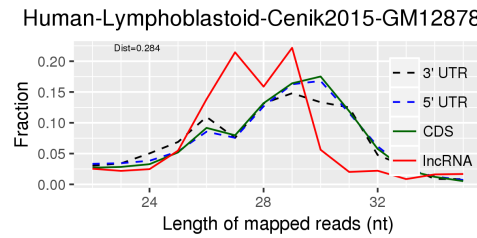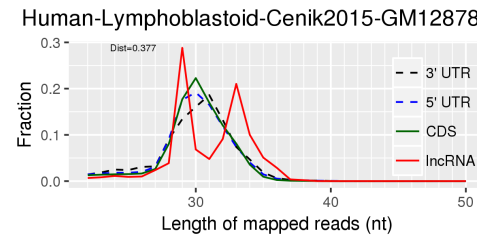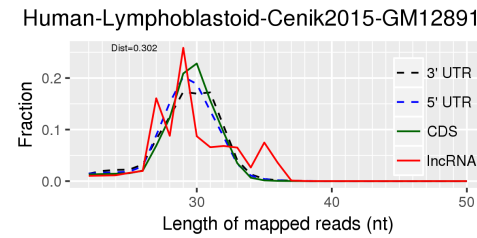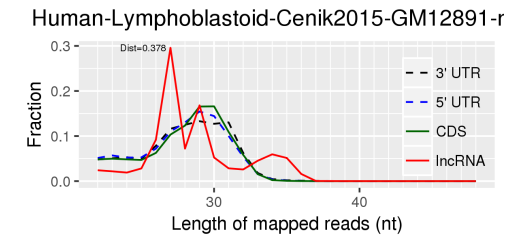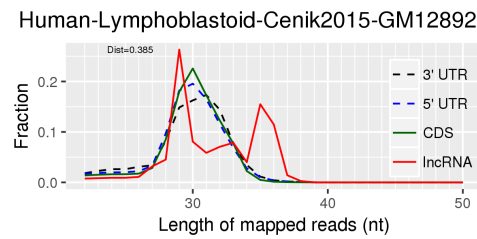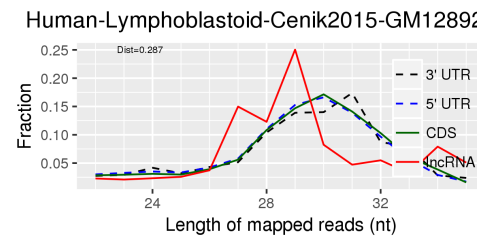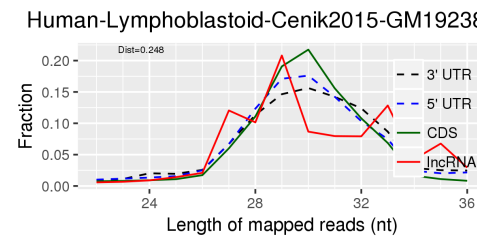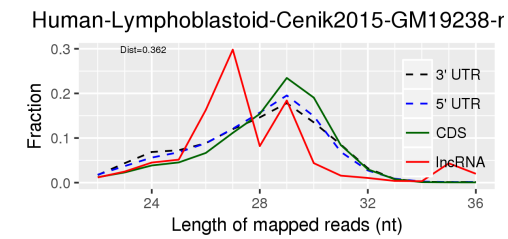

Human-Lymphoblastoid-Cenik2015-GM19239-r

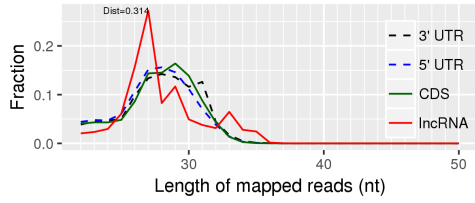

Human-Lymphoblastoid-Cenik2015-GM19240-l

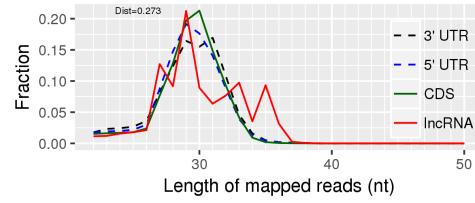

Human-Lymphoblastoid-Cenik2015-GM19240-r

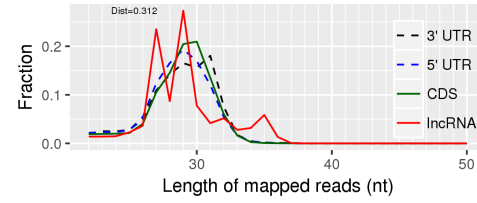

Human-Lymphoblastoid-Cenik2015-GM19240-l

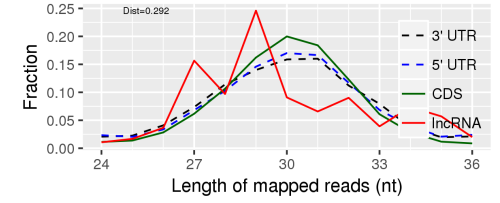

Human-Macrophages-Su2015-mock-rep1

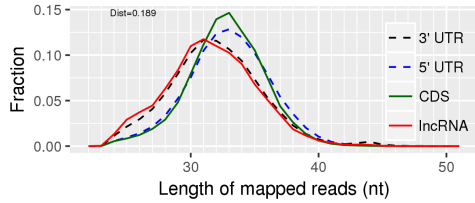

Human-Macrophages-Su2015-mock-rep2

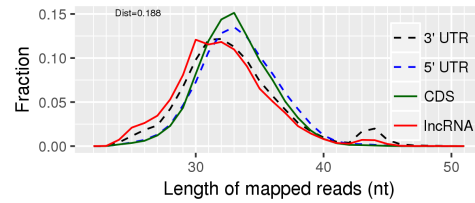

Human-Muscle-Wein2014-control

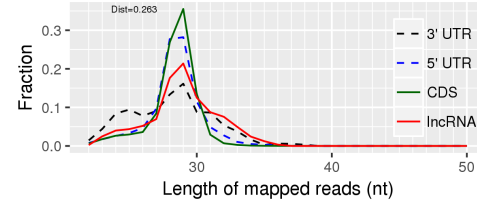

Human-Myeloma-Wiita2013-control

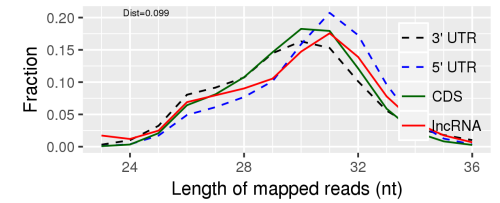

Human-NCCIT-Grow2015-wt

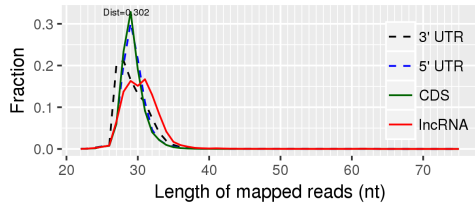

Human-PC3-Hsieh2012-control-rep1

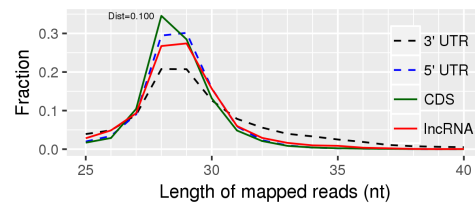

Human-PC3-Hsieh2012-control-rep2

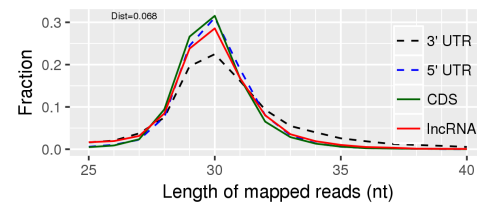

Human-RPE-1-Tanenbaum2015-G1-rep1

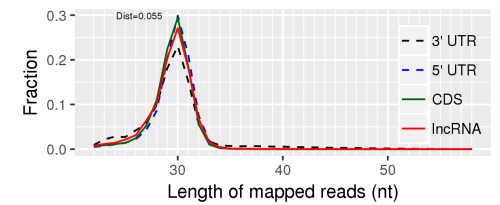

Human-RPE-1-Tanenbaum2015-G1-rep2

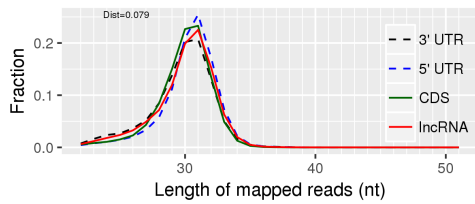

Human-RPE-1-Tanenbaum2015-G2-rep1

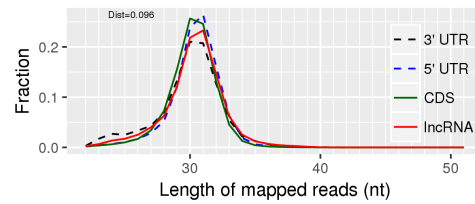

Human-RPE-1-Tanenbaum2015-G2-rep2

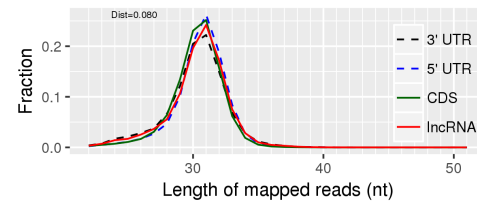

Human-RPE-1-Tanenbaum2015-M-rep1

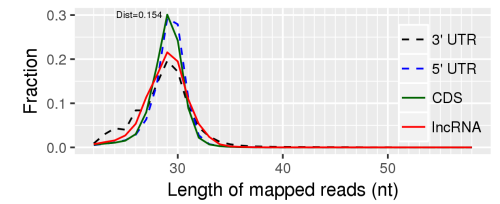



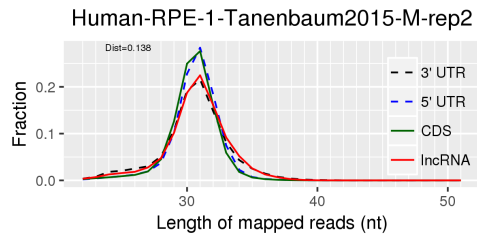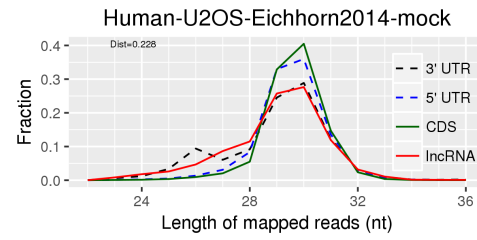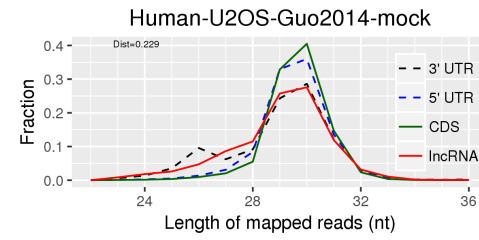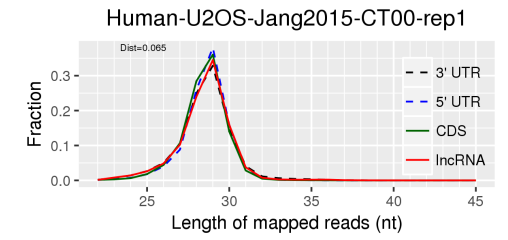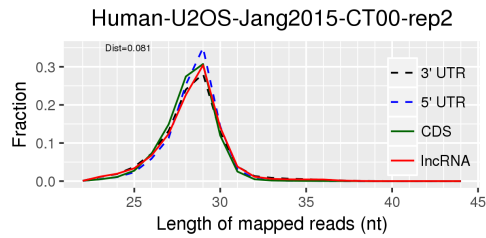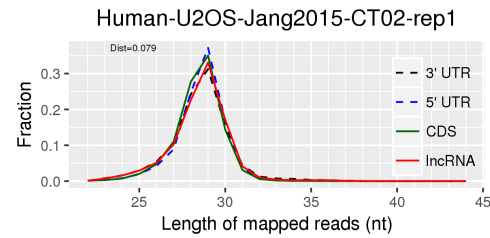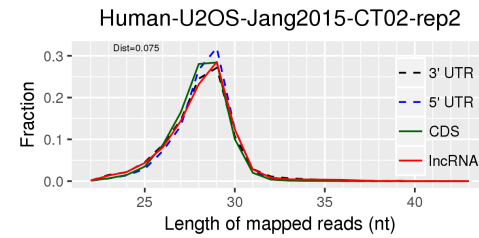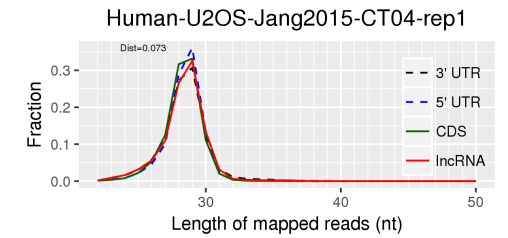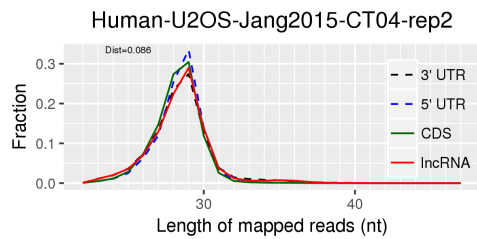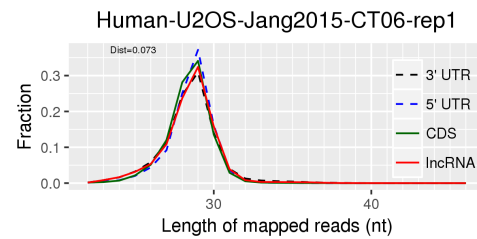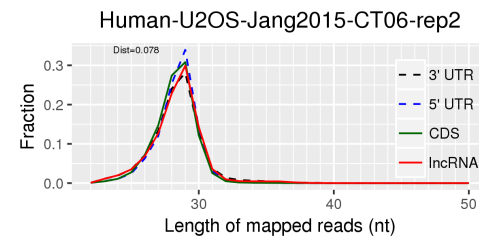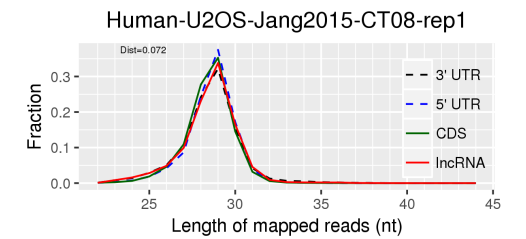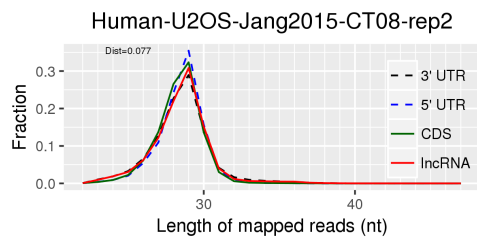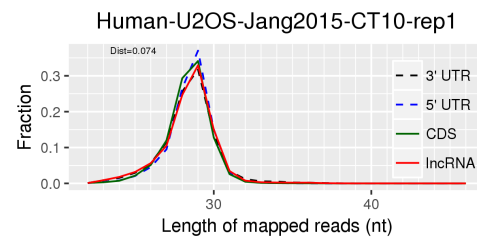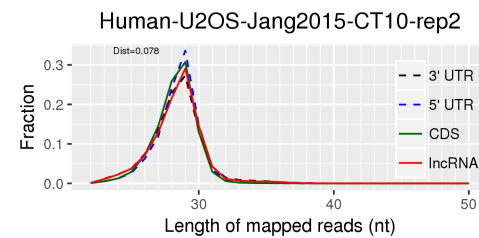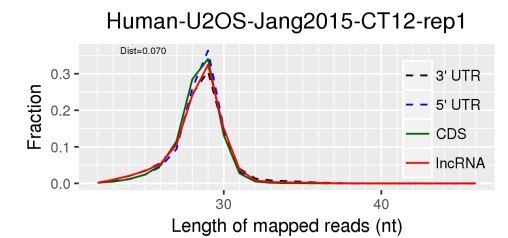

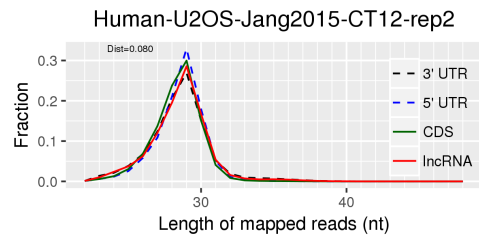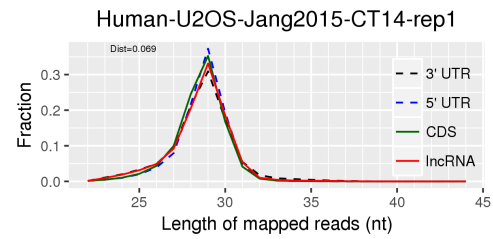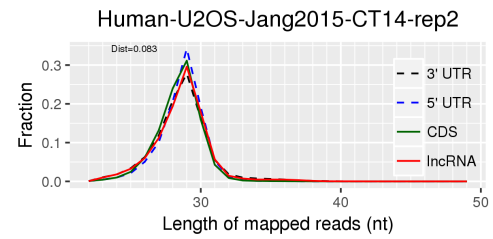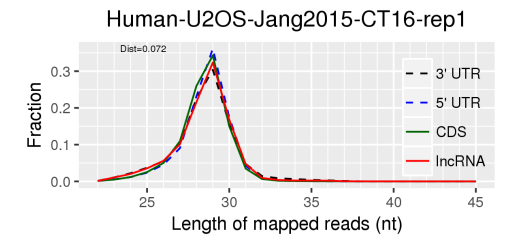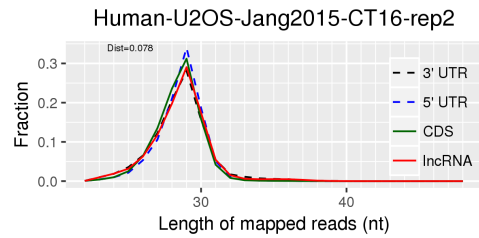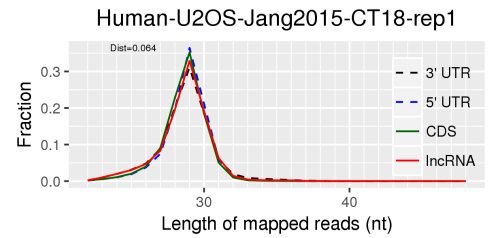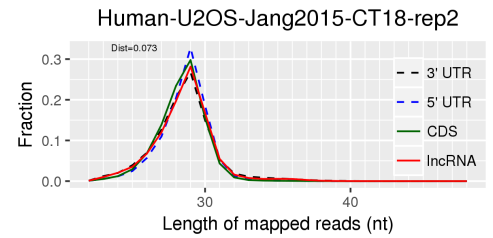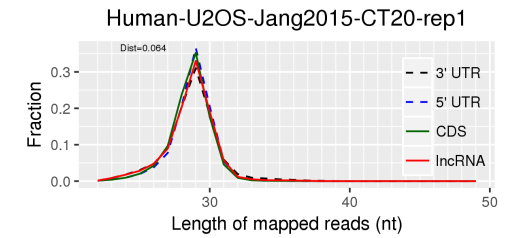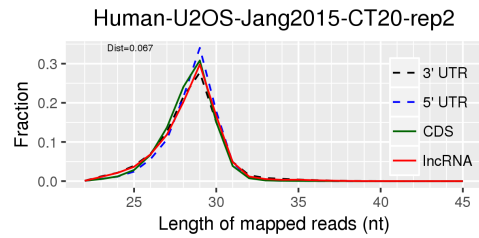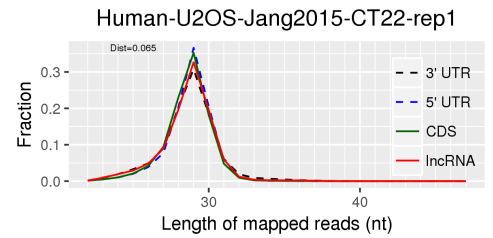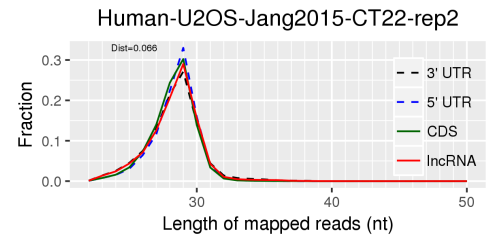

Supplement: 12864_2018_4765_MOESM4_ESM.pdf [file 12864_2018_4765_MOESM4_ESM.pdf]
