# Supplementary material for: Identification and analysis of ribosome-associated lncRNAs using ribosome profiling data
Source: PubMed Central journal article supplement (PMC5975437; doi:10.1186/s12864-018-4765-z), 2018-05-29

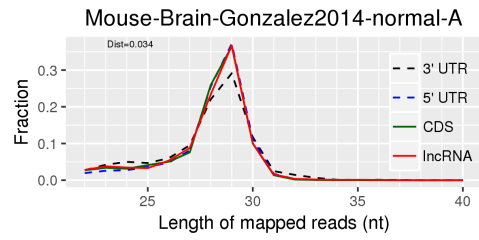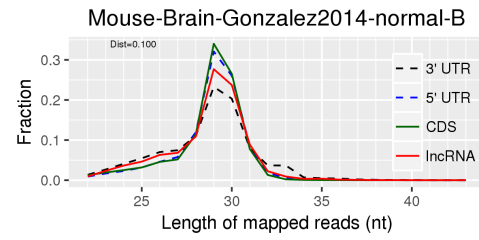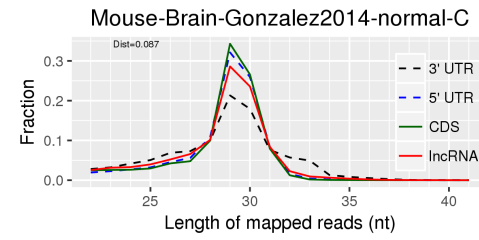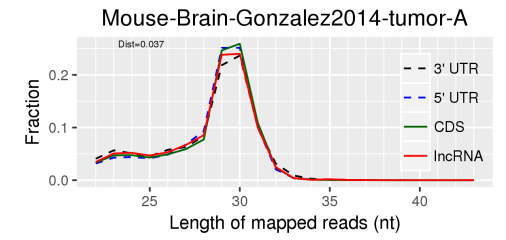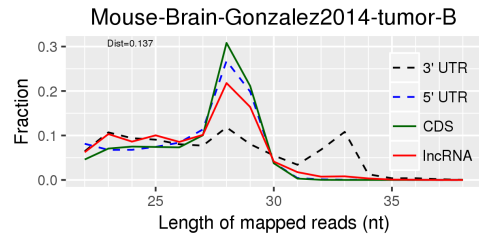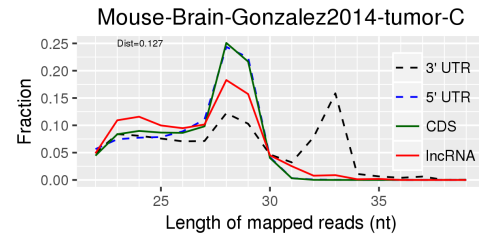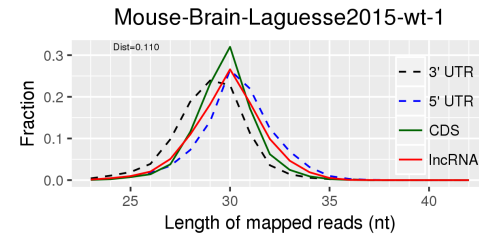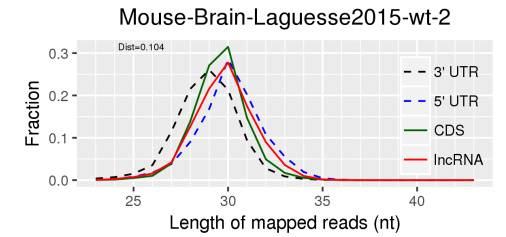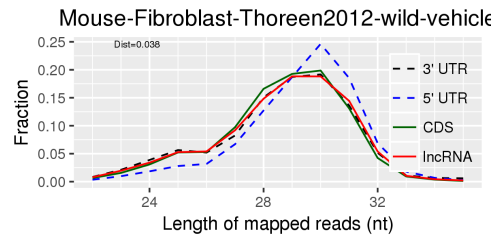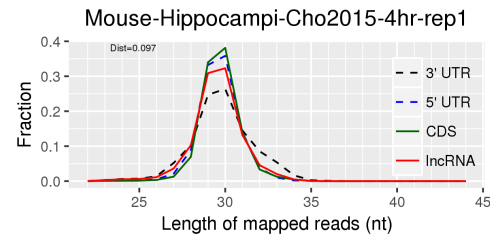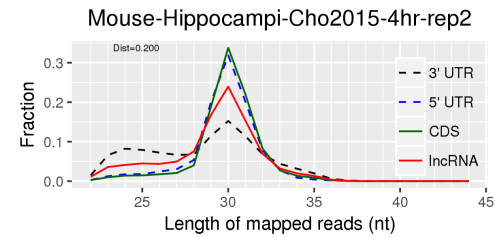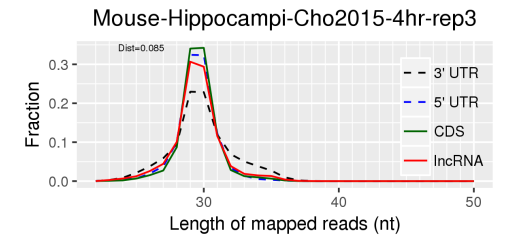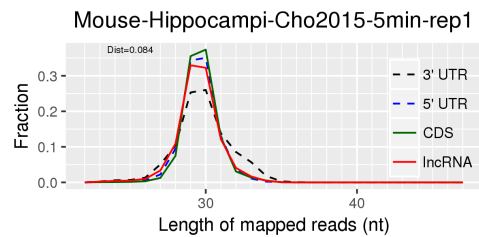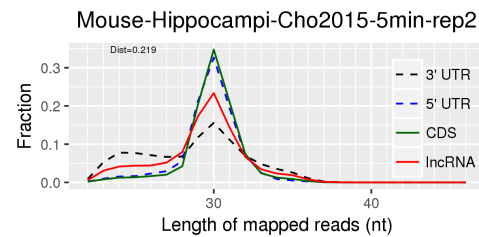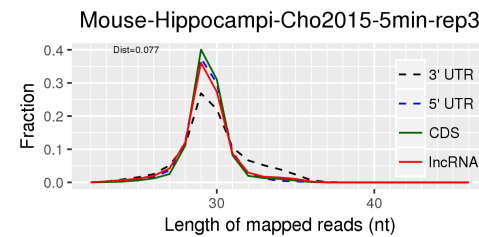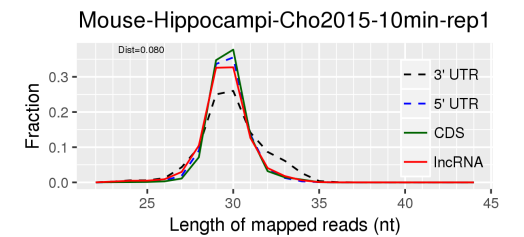

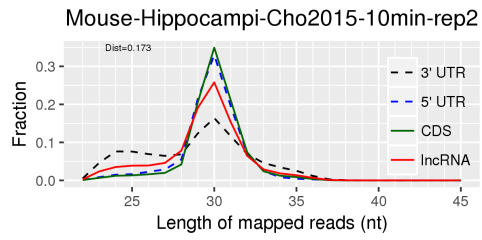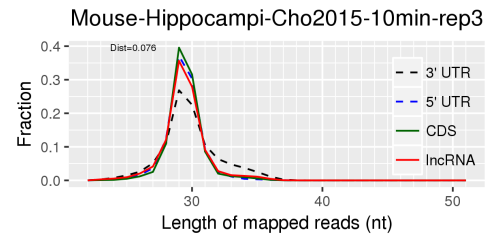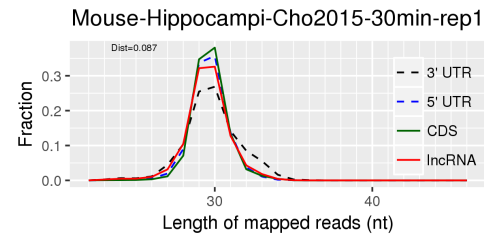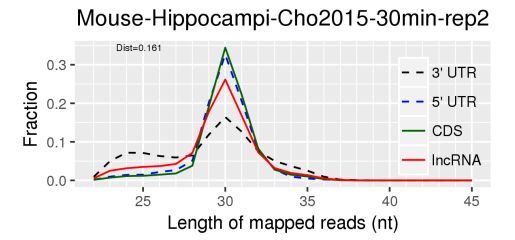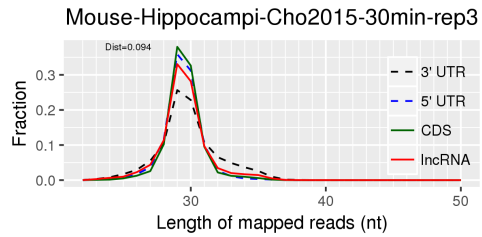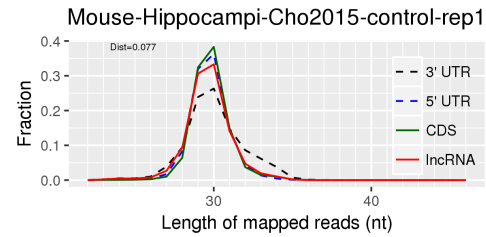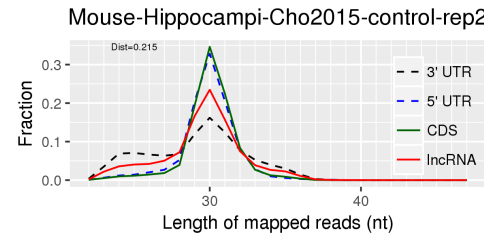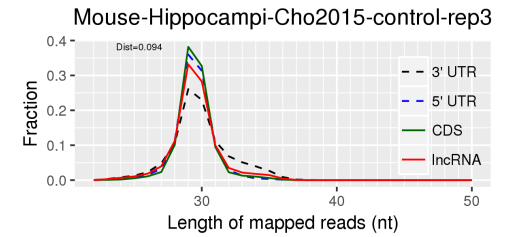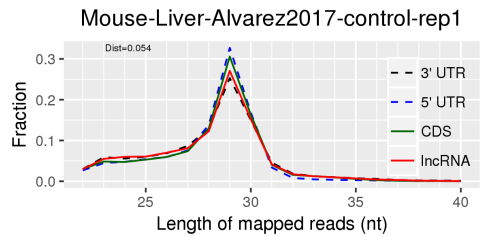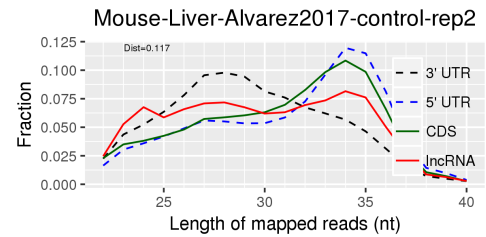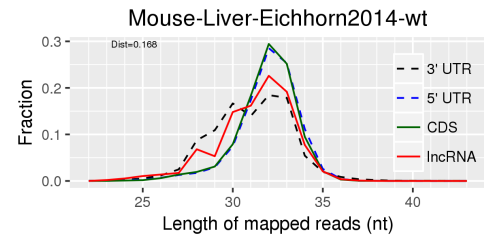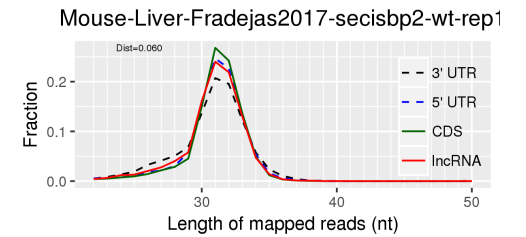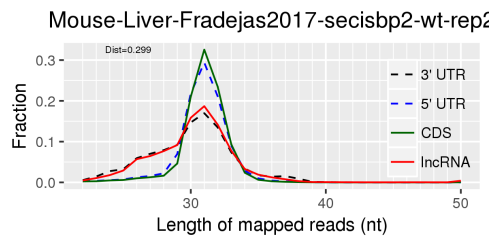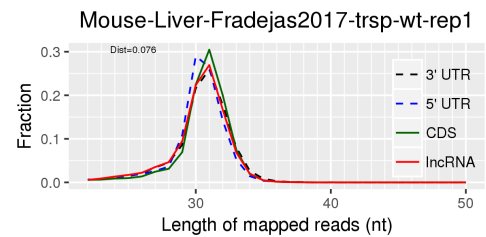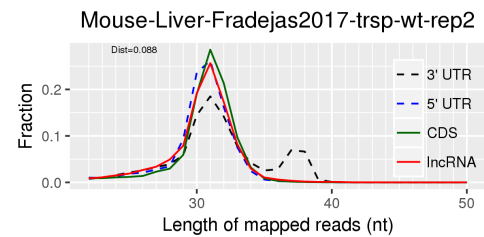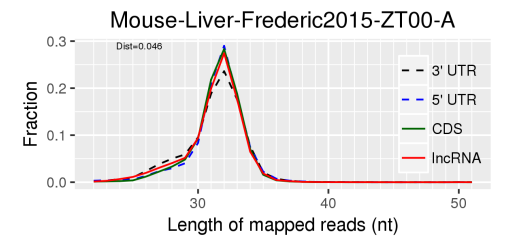

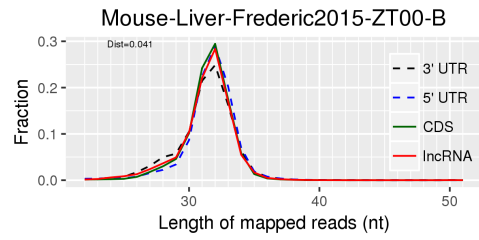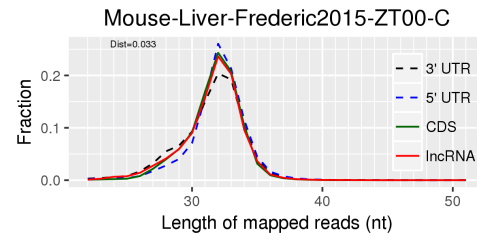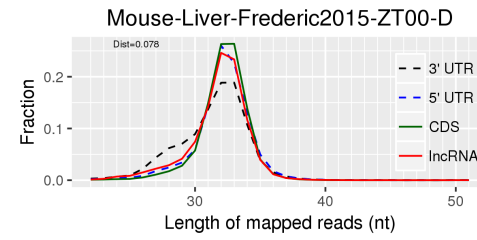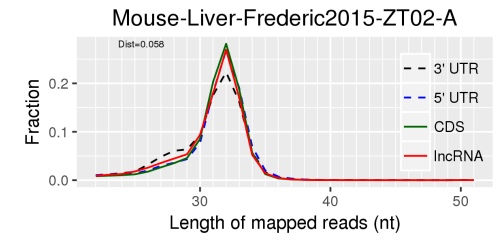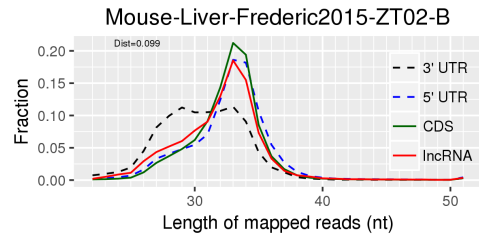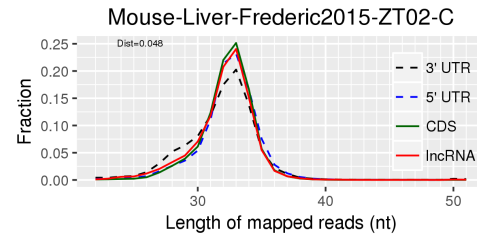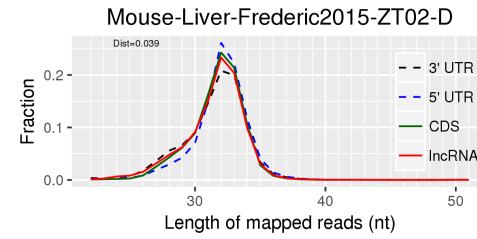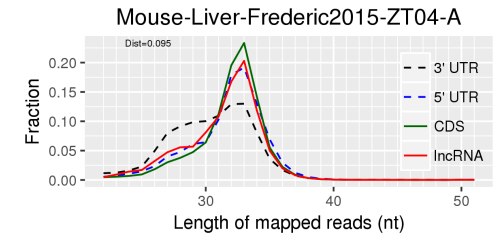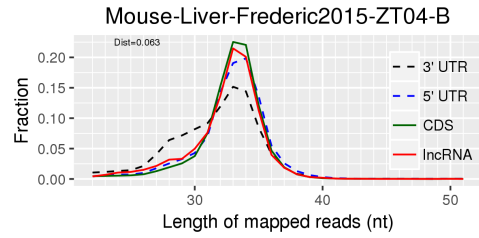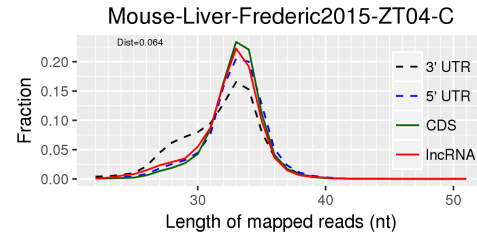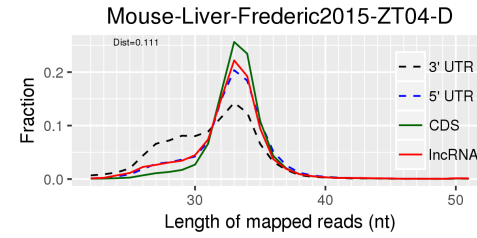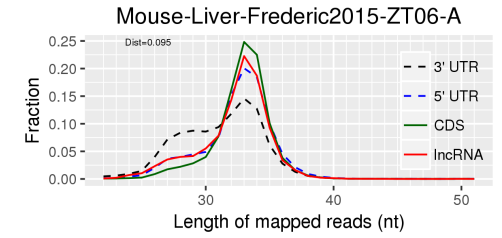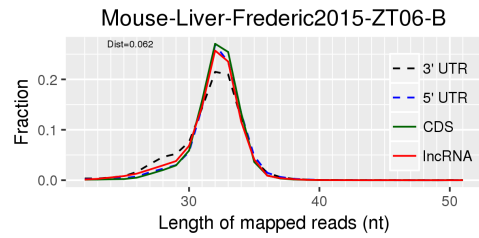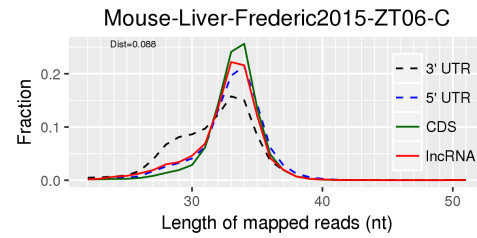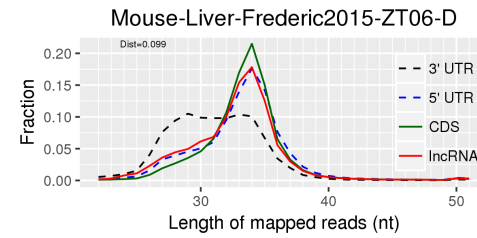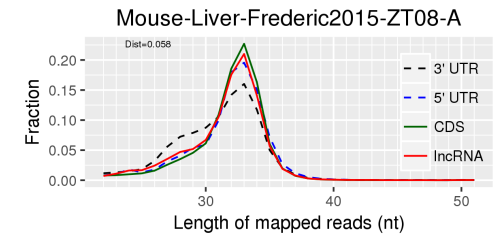

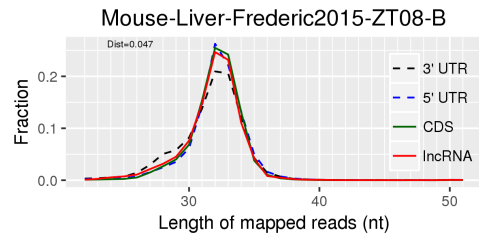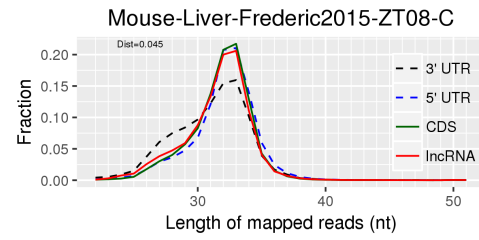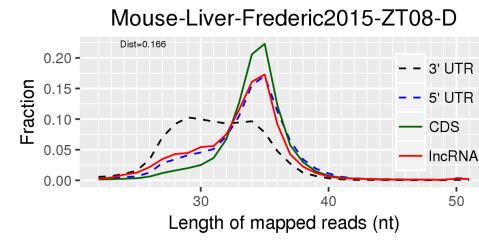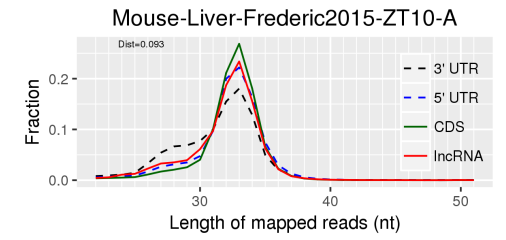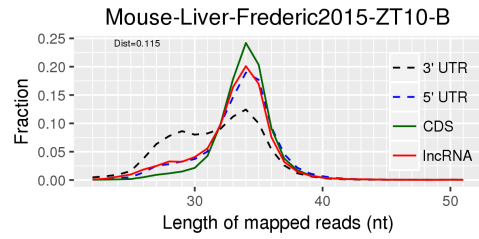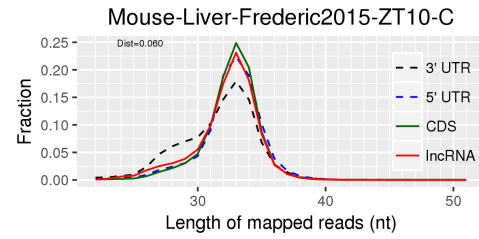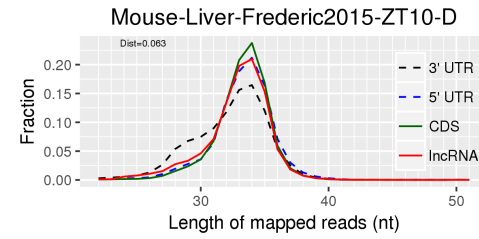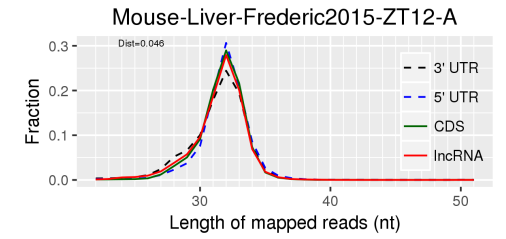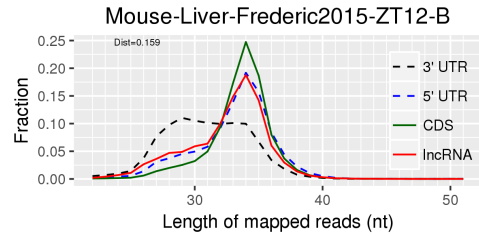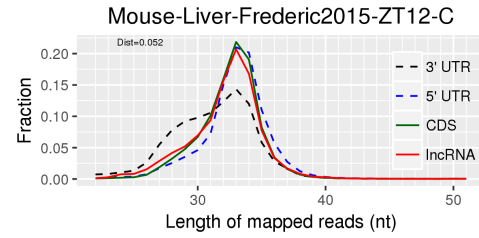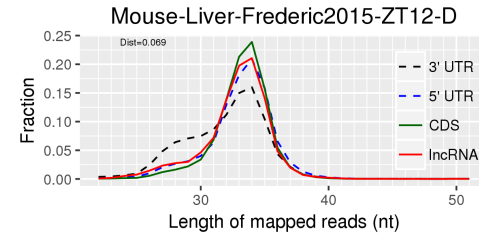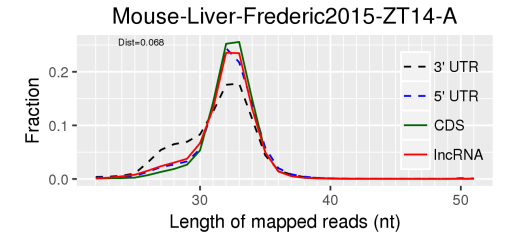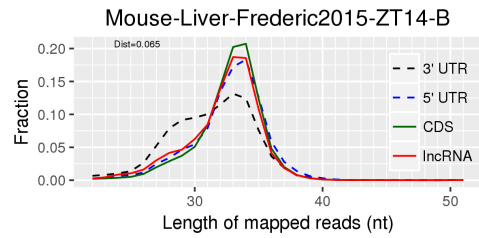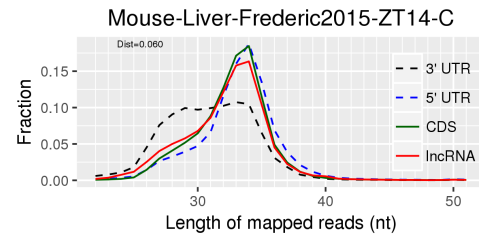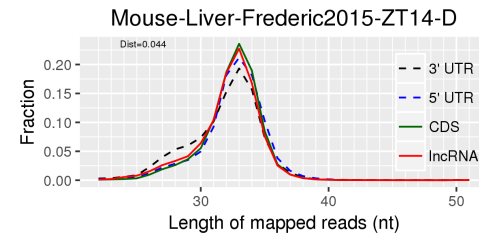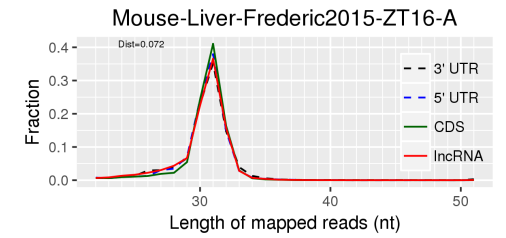



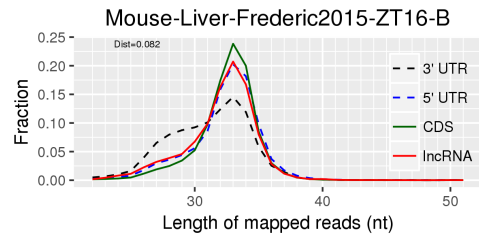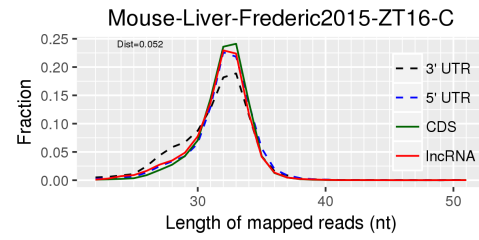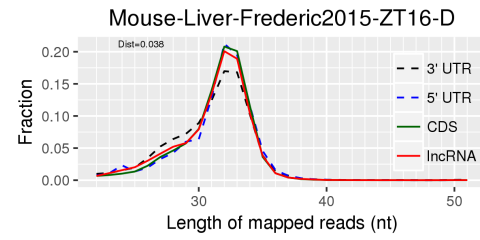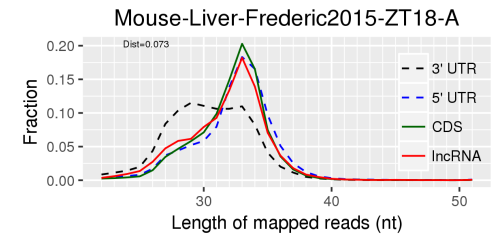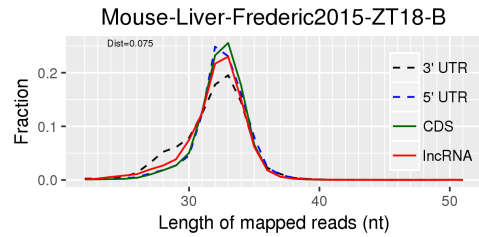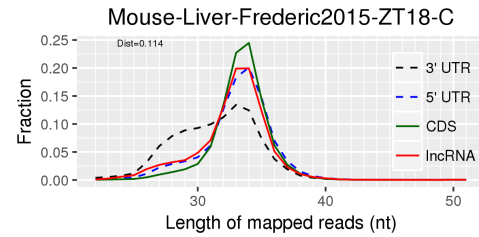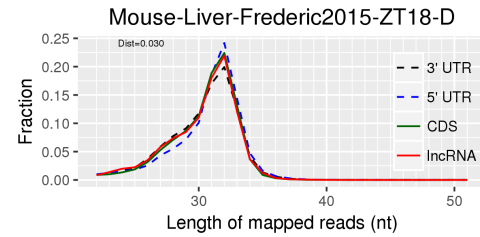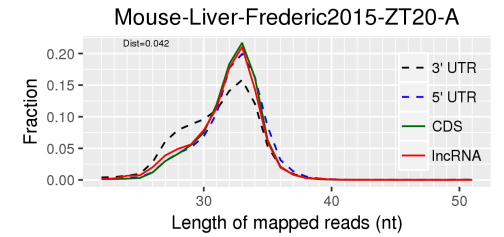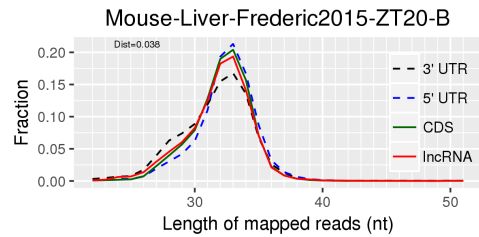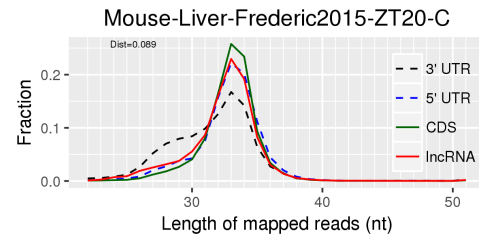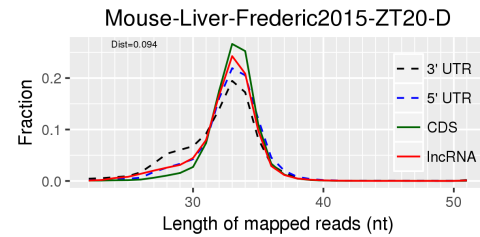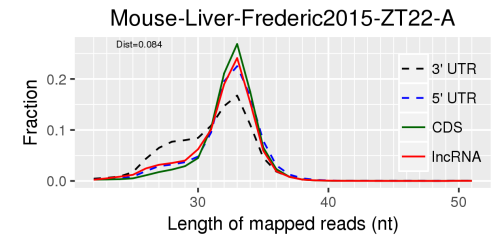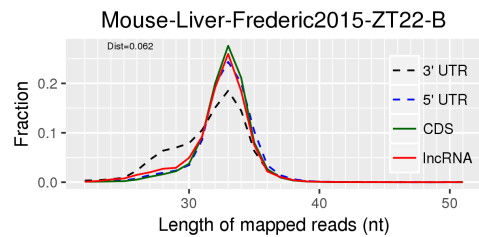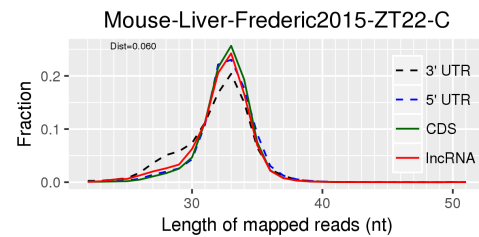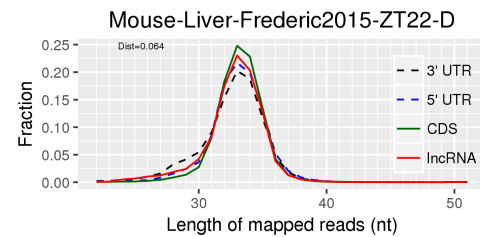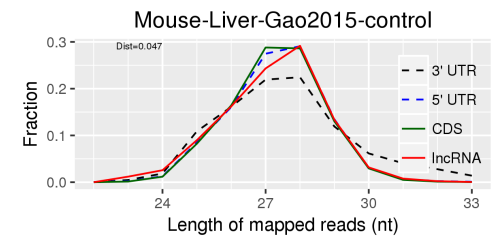

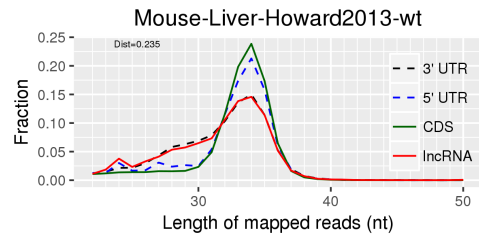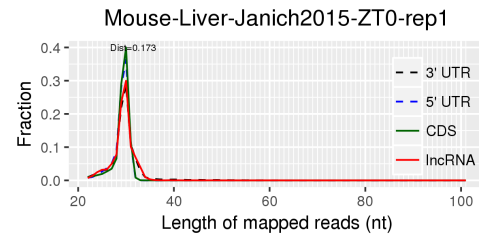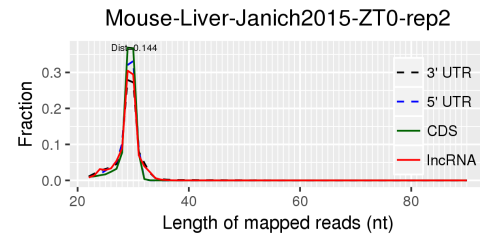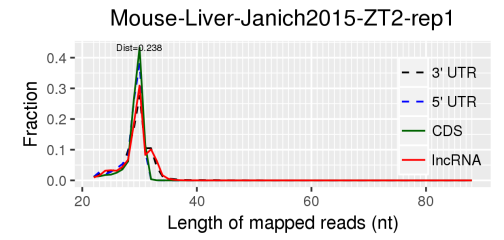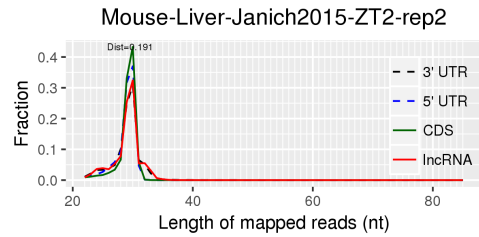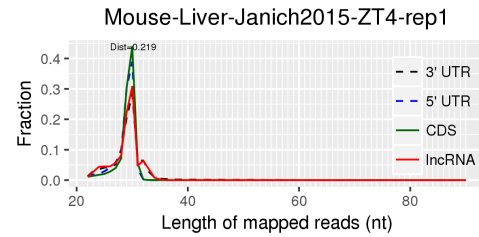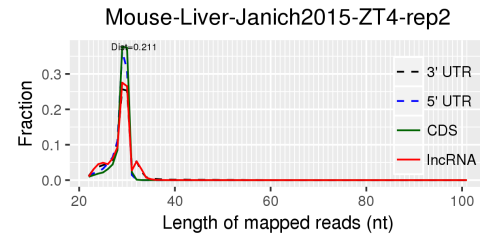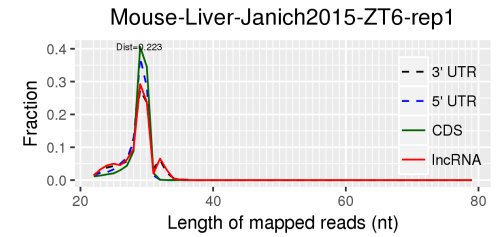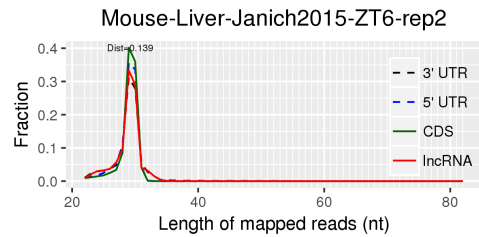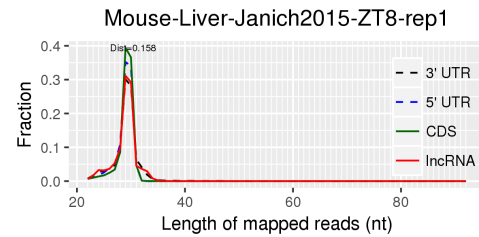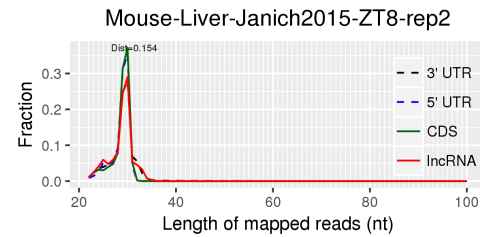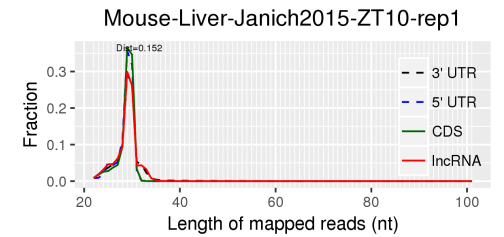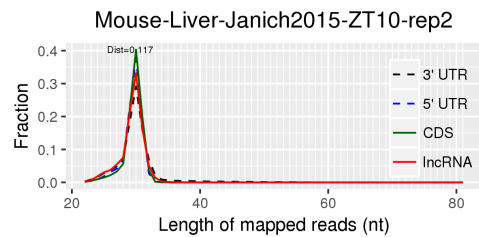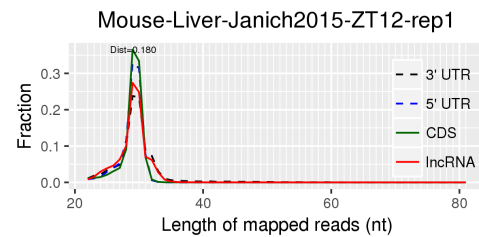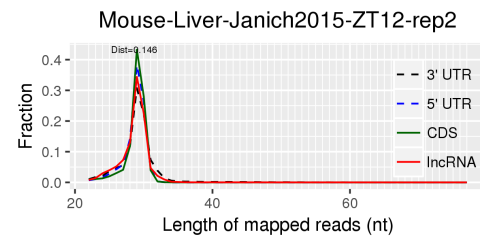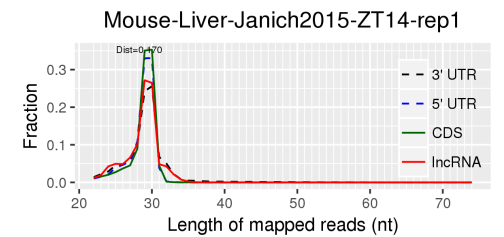

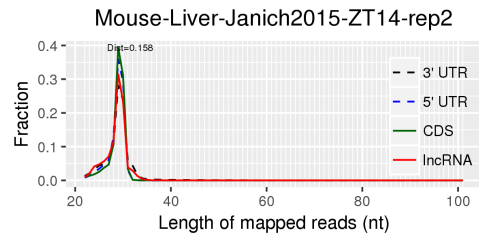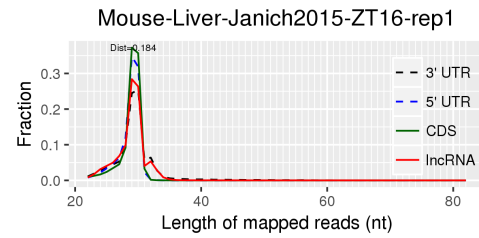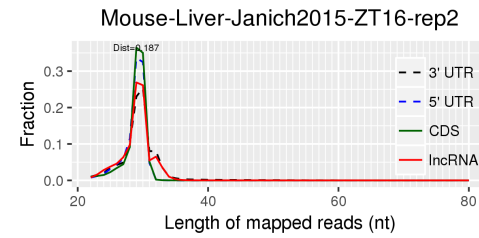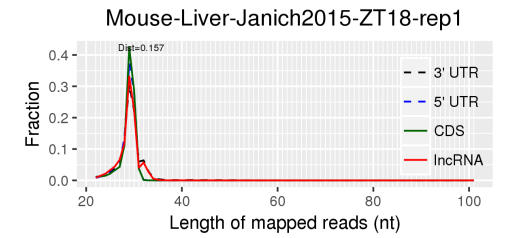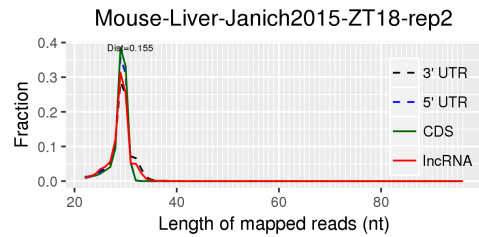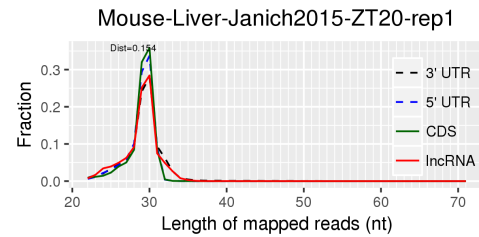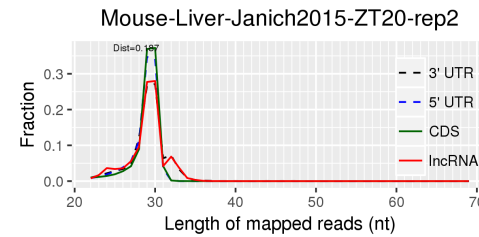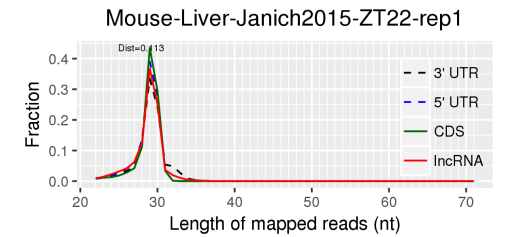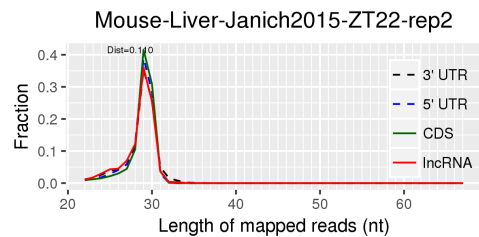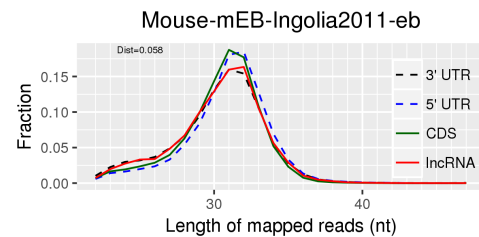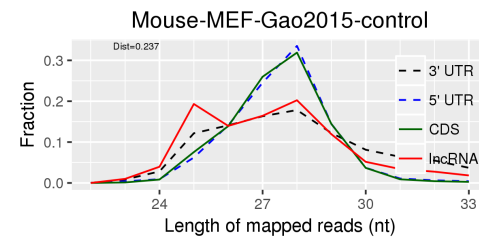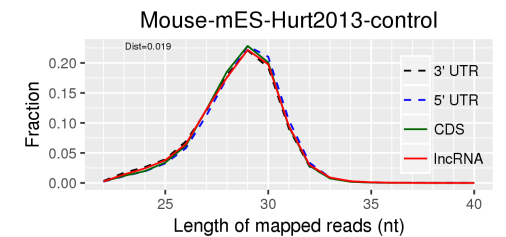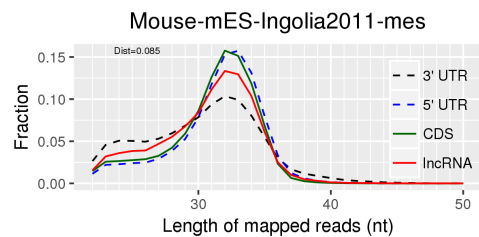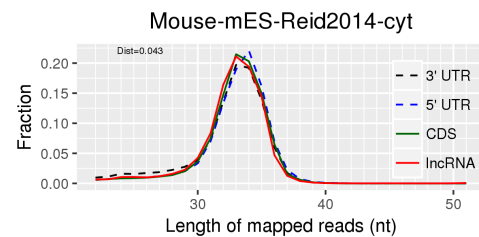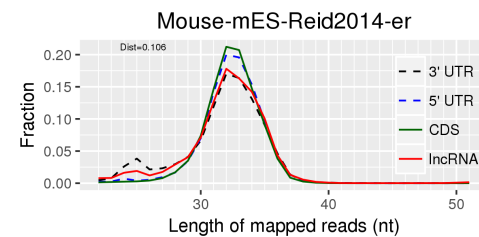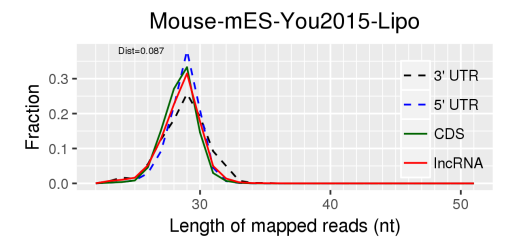

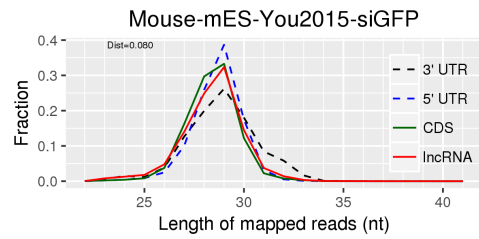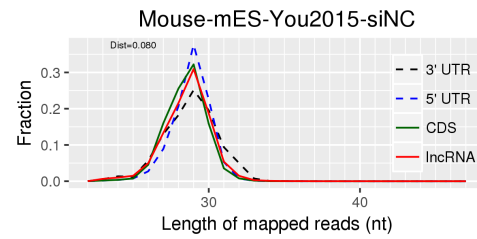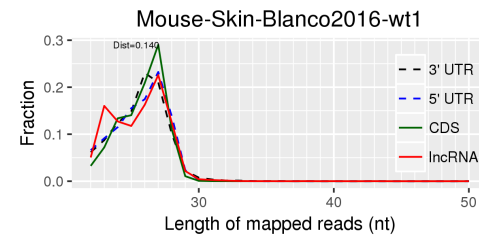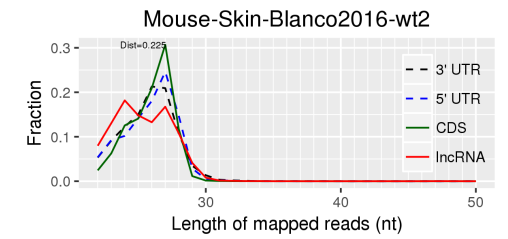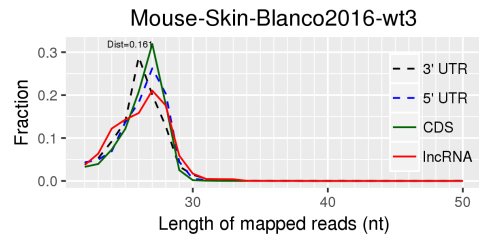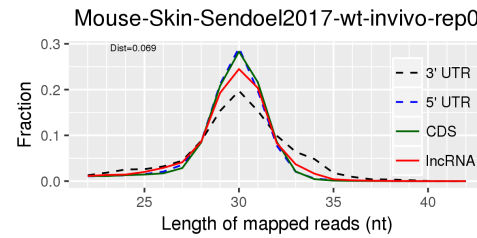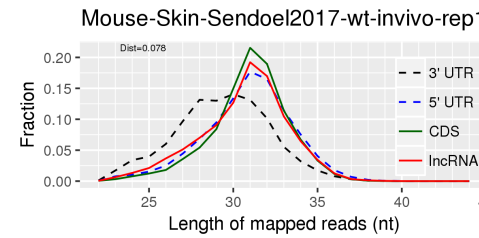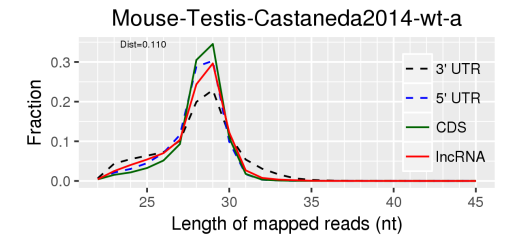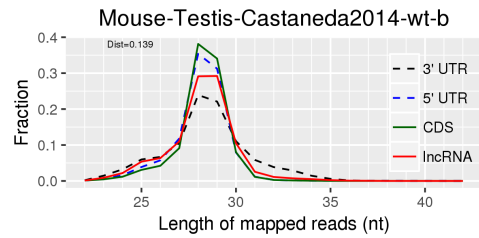

Supplement: 12864_2018_4765_MOESM5_ESM.pdf [file 12864_2018_4765_MOESM5_ESM.pdf]
