# Supplementary material for: Identification and analysis of ribosome-associated lncRNAs using ribosome profiling data
Source: PubMed Central journal article supplement (PMC5975437; doi:10.1186/s12864-018-4765-z), 2018-05-29

### Myeloma (human)

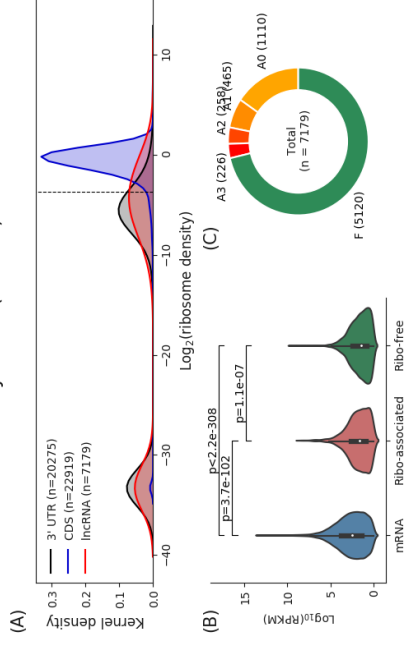

### Foreskin (human)

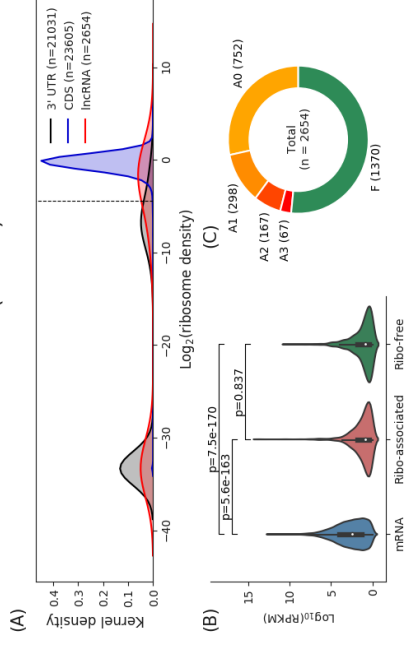

### Brain (human)

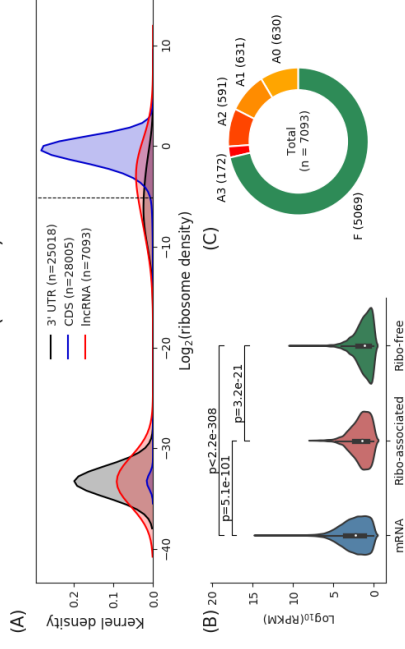

### PC3 (human)

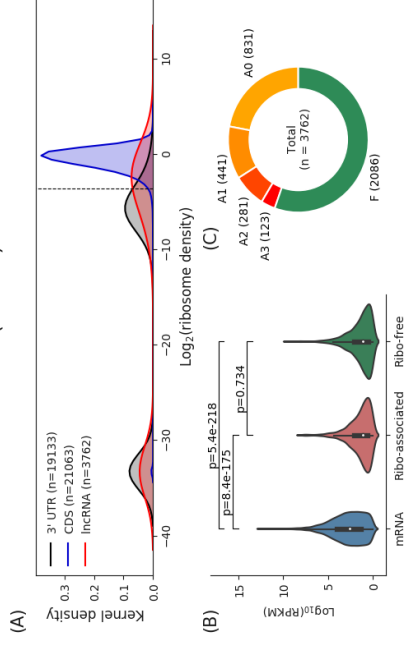

### HEK293 (human)

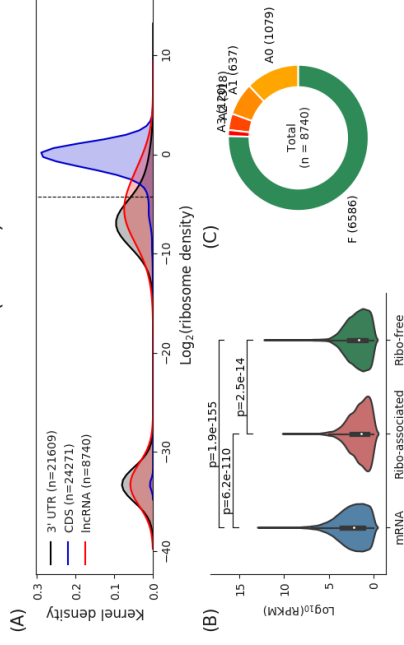

### ES (human)

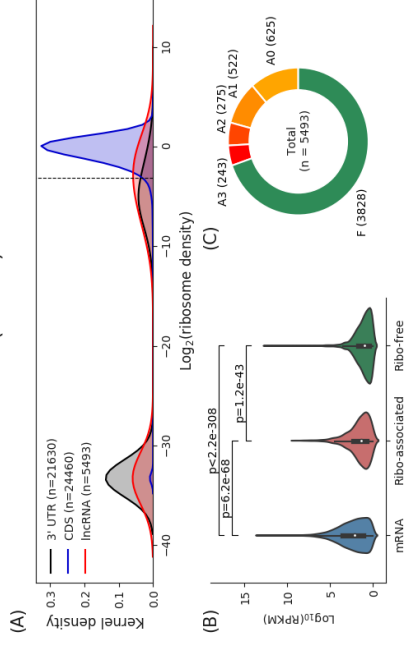

### RPE-1 (human)

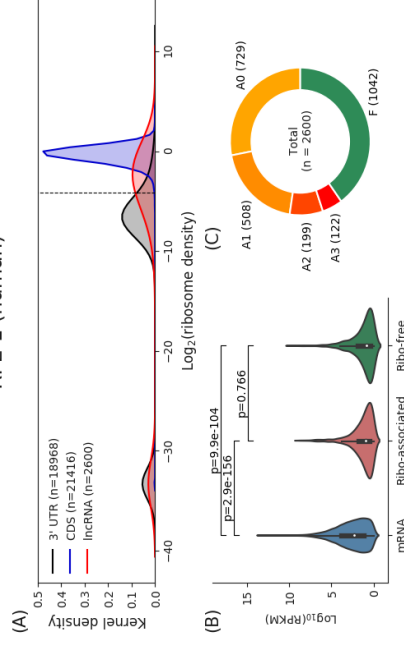

### HeLa (human)

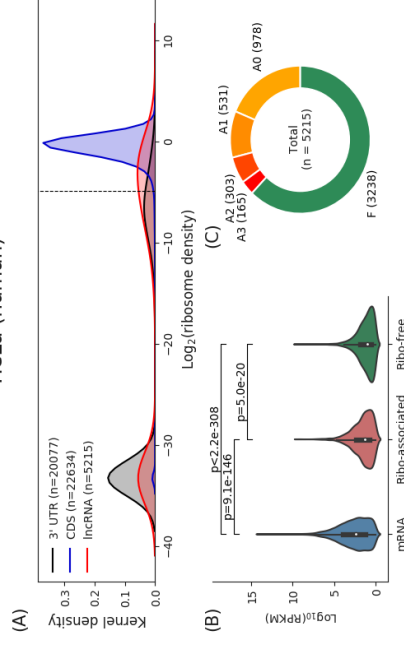

### Fibroblasts (human)

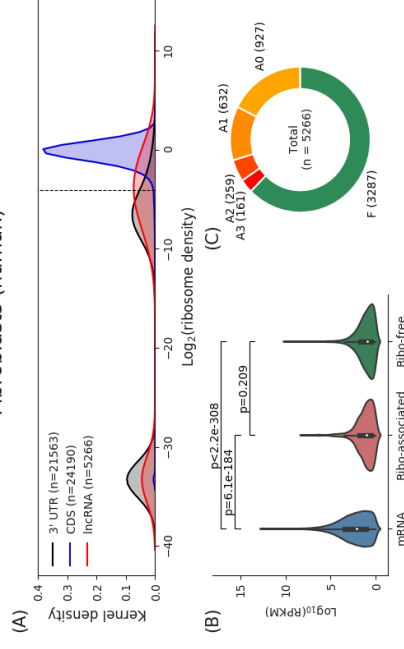

### Liver (mouse)

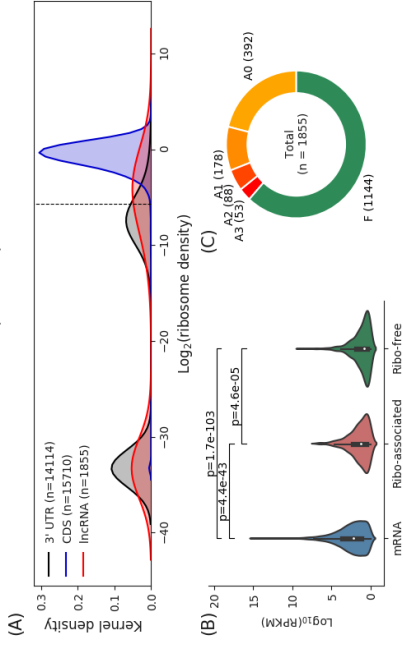

### ES (mouse)

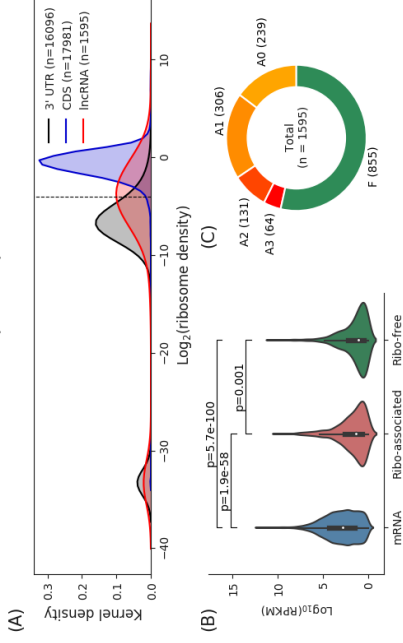

### U2OS (human)

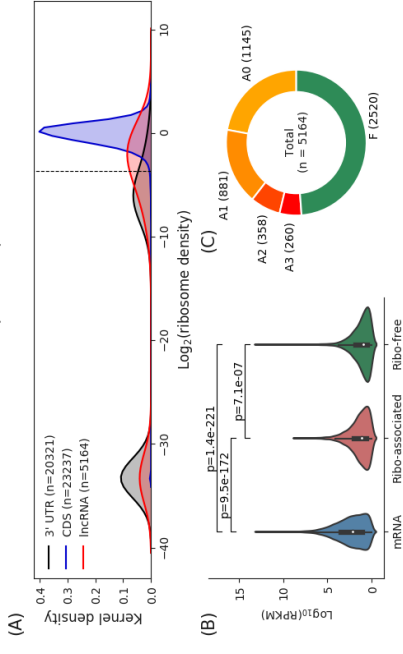

### Skin (mouse)

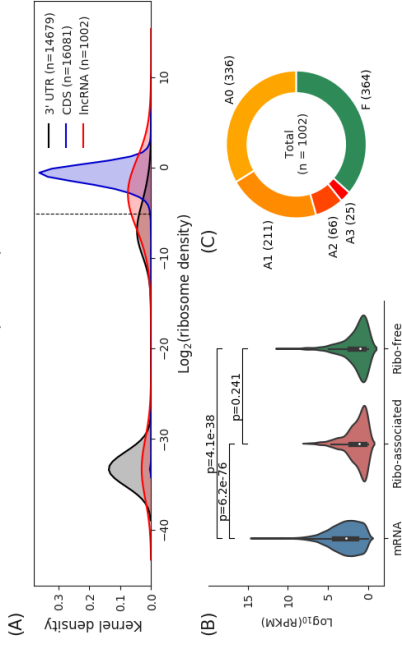

### Fibroblasts (mouse)

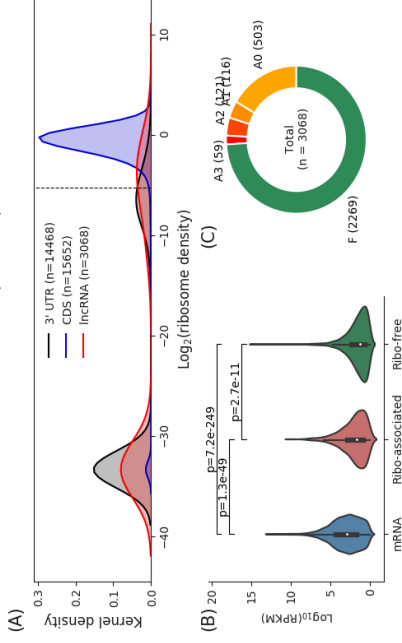

### Brain (mouse)

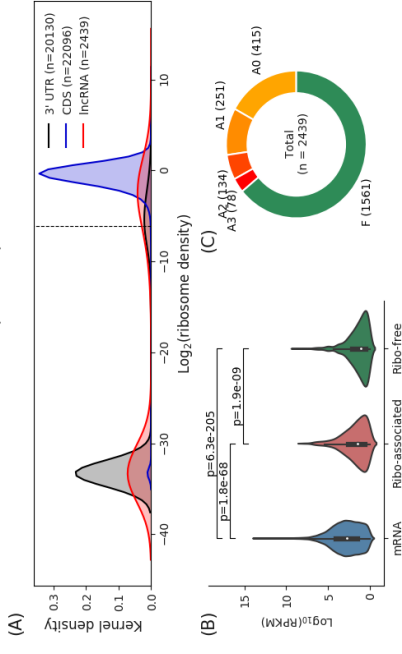

### Testis (mouse)

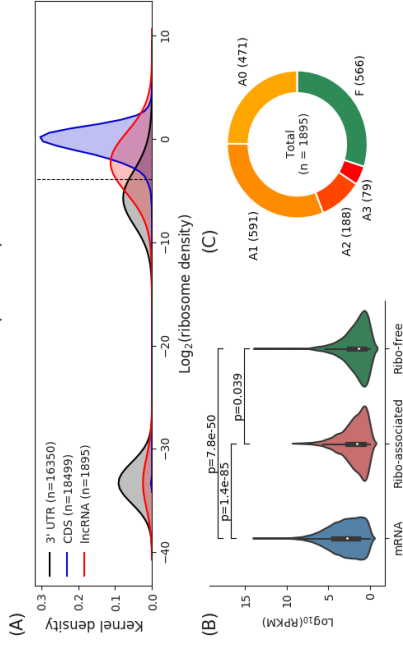

### Hippocampi (mouse)

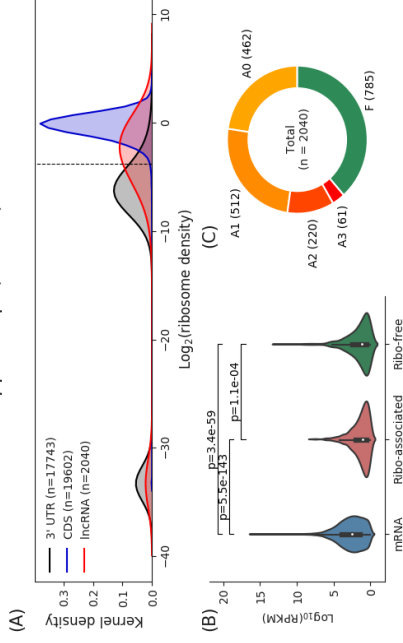

### EB (mouse)

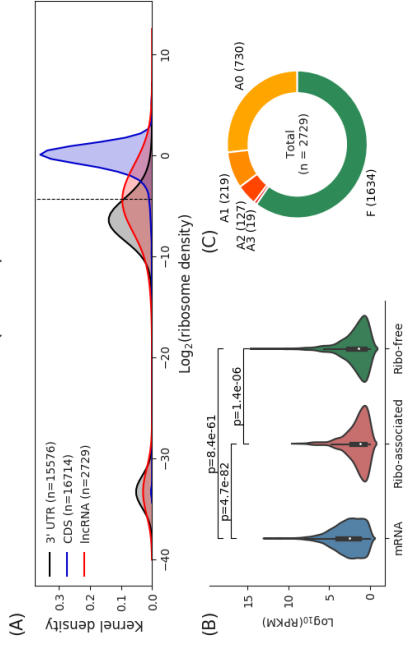

Supplement: 12864_2018_4765_MOESM9_ESM.pdf [file 12864_2018_4765_MOESM9_ESM.pdf]
