# Supplementary material for: Identification and analysis of ribosome-associated lncRNAs using ribosome profiling data
Source: PubMed Central journal article supplement (PMC5975437; doi:10.1186/s12864-018-4765-z), 2018-05-29
Supplement: 12864_2018_4765_MOESM17_ESM.pdf [file 12864_2018_4765_MOESM17_ESM.pdf]

|               | Human        |                           | Mouse       |                           |
|---------------|--------------|---------------------------|-------------|---------------------------|
|               | #Total       | #snoRNA host (odds ratio) | #Total      | #snoRNA host (odds ratio) |
| trans-lncRNA  | 78           | *** 22 (20.46)            | 42          | ** 5 (7.26)               |
| ribo-lncRNA   | 613          | *** 70 (10.71)            | 367         | *** 44 (11.21)            |
| noribo-lncRNA | 746          | 5 (0.42)                  | 326         | *** 57 (20.75)            |
| other         | 12209        | 112 (0.14)                | 5525        | 1 (0.00)                  |
| <b>Total</b>  | <b>13646</b> | <b>209</b>                | <b>6260</b> | <b>107</b>                |

(One-sided fisher's exact test) \*:  $p < 0.05$ , \*\*:  $p < 0.01$ , \*\*\*:  $p < 0.001$
